# Supplementary material for: A one-step immunoassay based on switching peptides for diagnosis of porcine epidemic diarrhea virus (PEDV) using screened Fv-antibodies
Source: Royal Society of Chemistry journal article supplement (doi:10.1039/d4tb00066h), 2024-01-01
Supplement: d4tb00066h1.pdf [file d4tb00066h1.pdf]

## Supporting Information

### **One-step immunoassay based on switching peptides for diagnosis of porcine epidemic diarrhea virus (PEDV) using screened F<sub>V</sub>-antibodies**

Tae-Hun Kim,<sup>a</sup> Jae-Yeon Park,<sup>b</sup> Jaeyong Jung,<sup>a</sup> Jeong Soo Sung,<sup>a</sup> Soonil Kwon,<sup>a</sup> Hyung Eun Bae,  
<sup>a</sup> Hyun-Jin Shin,<sup>b</sup> Min-Jung Kang,<sup>c</sup> Joachim Jose,<sup>d</sup> and Jae-Chul Pyun<sup>\*a</sup>

<sup>a</sup>Department of Materials Science and Engineering, Yonsei University, 50 Yonsei-Ro, Seodaemun-Gu, Seoul 03722, Korea

<sup>b</sup>College of Veterinary Medicine, Chungnam National University, Daejeon, 34134, South Korea

<sup>c</sup>Korea Institute of Science and Technology (KIST), Seoul, Korea

<sup>d</sup>Institute of Pharmaceutical and Medical Chemistry, Westfälischen Wilhelms-Universität Münster, Muenster, Germany.

\*To whom correspondence should be addressed

\*Corresponding author: Jae-Chul Pyun, Tel.: +82 2 2293 5509; Fax: 82 2 312 5375; Email: jcpyun@yonsei.ac.kr

# Supporting Information

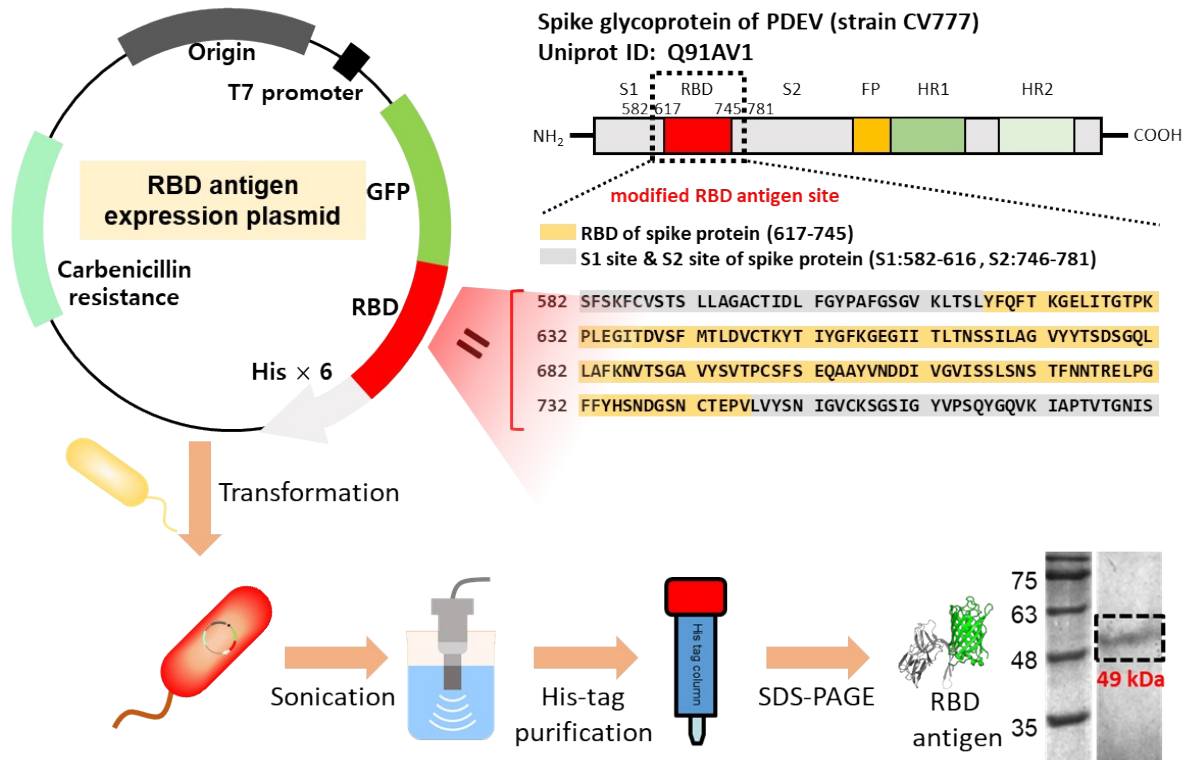

**Fig. S1** Expression of RBD antigen from PEDV (strain CV777) S protein for the screening of Fv-antibody library. The RBD consisted of 129 amino acid residues (21.2 kDa), which included a part of the S protein (amino acid number from 582 to 781). SDS-PAGE showed the GFP (26.9 kDa) and His-tag were included in the structure of RBD antigen (49 kDa).

# Supporting Information

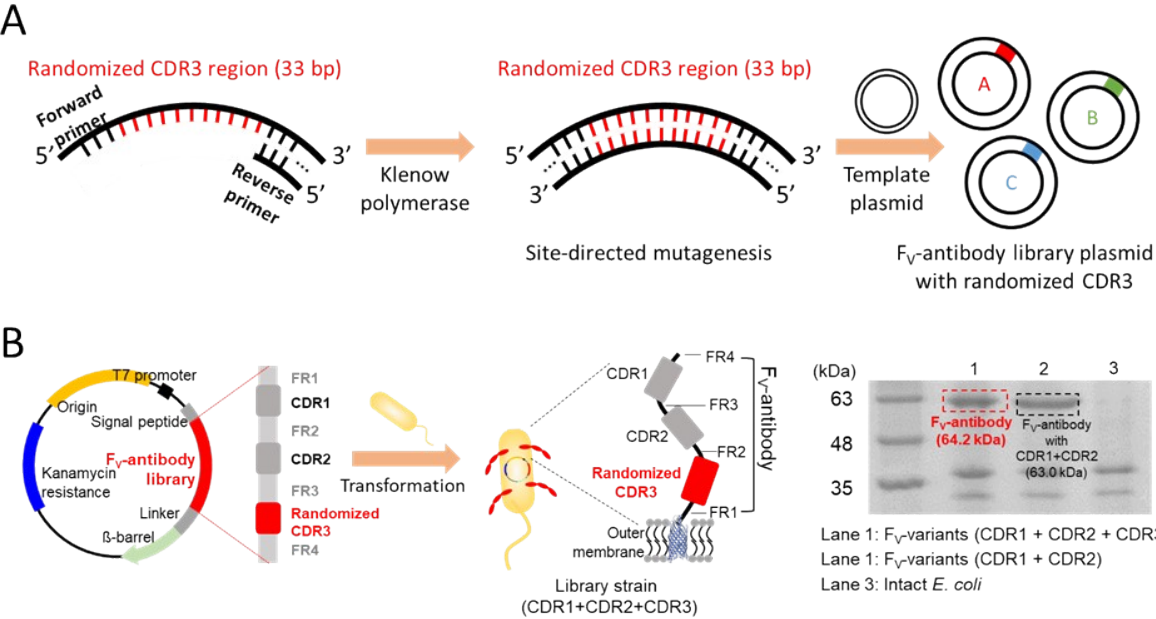

**Fig. S2** An autodisplayed F<sub>V</sub>-library with a randomized CDR3 region was used to screen for F<sub>V</sub>-antibodies against PEDV S protein. (A) Preparation of the F<sub>V</sub>-library with a randomized CDR3 region in the V<sub>H</sub> using site-directed mutagenesis. (B) Expression of the F<sub>V</sub>-library on the outer membrane of *E. coli* using an autodisplay vector (SDS-PAGE of the autodisplayed F<sub>V</sub>-variant, control strain with CDR1 and CDR2, and intact *E. coli*).

# Supporting Information

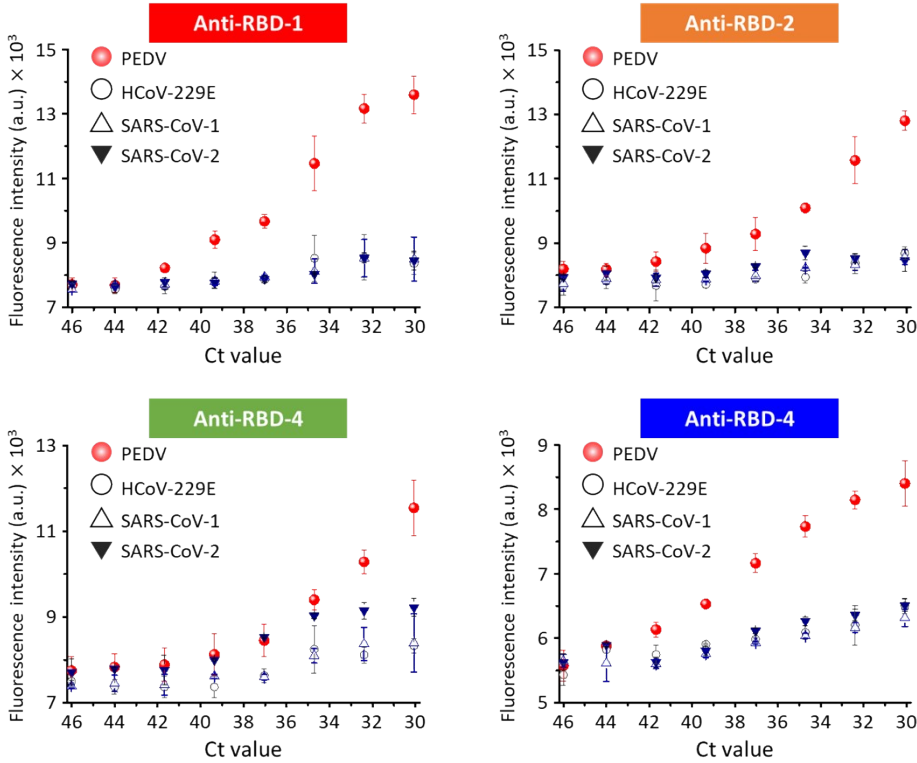

**Fig. S3** Specificity test of Fv-antibodies (Anti-RBD-1, Anti-RBD-2, Anti-RBD-3, and Anti-RBD-4) using the positive sample (PEDV) and negative control samples (HCoV-229E, SARS-CoV-1, and SARS-CoV-2) to Fv-antibodies.

# Supporting Information

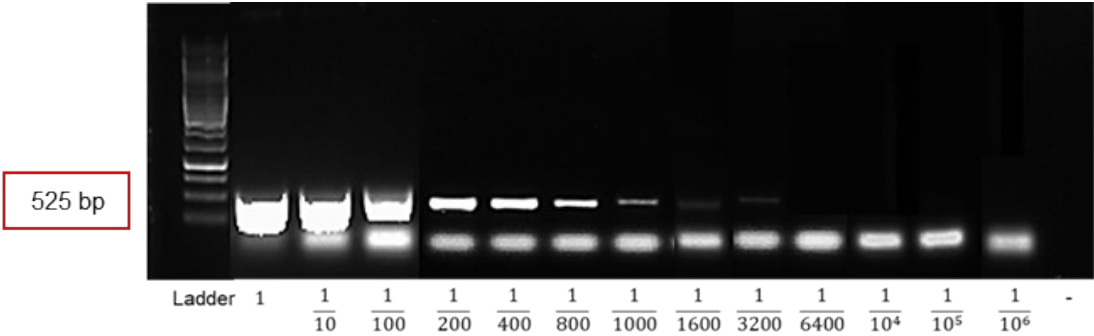

**Fig. S4** Quantitative analysis of the RNA from PEDV in supernatant media of Vero cell was extracted using Patho Gene-spin™ DNA/RNA extraction kit from iNtRON Biotechnology (Gyeonggi-do, Korea). The amount of RNA from each diluted PEDV samples were analyzed using PEDV PCR reaction kit from iNtRON Biotechnology (Gyeonggi-do, Korea). The PCR reaction was performed according to the manufacturer’s instructions. After PCR reaction. the band intensity was calculated using software (ImageJ).

# Supporting Information

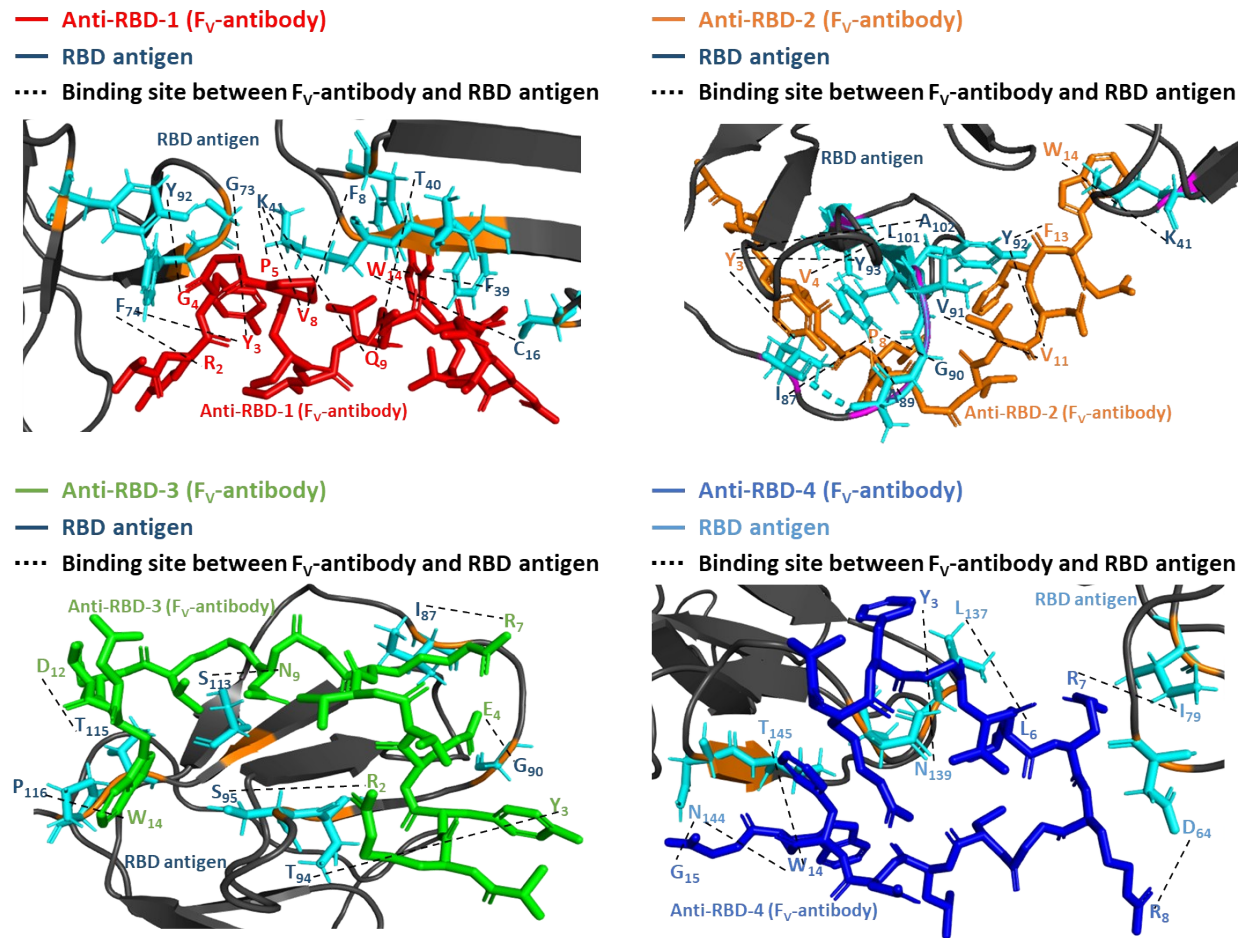

**Fig. S5** Analysis of interaction between screened F<sub>V</sub>-antibodies (Anti-RBD-1, Anti-RBD-2, Anti-RBD-3, Anti-RBD-4) and RBD antigen from PEDV S protein (Uniprot ID: Q91AV1) using molecular docking software.

**Table S1.** Primer sequences of randomized CDR3 region of the F<sub>V</sub>-antibody library. Randomized forward primer (75 bases) and corresponding reverse primer (22 bases) and composition of nucleotides at each position were listed in the table.

| Primer type                                    | Oligonucleotide sequence                                                                                                                                                              |
|------------------------------------------------|---------------------------------------------------------------------------------------------------------------------------------------------------------------------------------------|
| Randomized forward primer<br>(75 bases)        | 5'-GTCTATTATTGCGCTCGT <u><sup>1</sup>KRYVNN <sup>7</sup>VNNVNN <sup>13</sup>VNNVNN <sup>19</sup>VNNVNN <sup>25</sup>VNNGAT</u><br><u><sup>31</sup>KWY</u> TGGGGTCAAGGTACTACGGTTACG-3' |
| Corresponding reverse primer<br>(22 bases)     | 3'-CCCAGTTCATGATGCCAATGC-5'                                                                                                                                                           |
| Composition of nucleotides<br>at each position | N = A, C, G, T / R = A, G / K = G, T / Y = C, T / W = A, T / V = A, C, G                                                                                                              |

# Supporting Information

**Table S2.** Amino acid and corresponding oligonucleotide sequences of F<sub>V</sub>-antibody. The CDR3 sequence was randomized for the preparation of F<sub>V</sub>-antibody library from the template using site-directed mutagenesis.

| Region             | Amino acid (N → C-term)          | Oligonucleotide sequence (5' → 3')                                                                                                       |
|--------------------|----------------------------------|------------------------------------------------------------------------------------------------------------------------------------------|
| Frame-1            | EVQLVESAAEVRPPGASVKITCKASGYSFS   | GAA GTG CAG CTC GTG GAA AGC GCT GCC GAA GTT CGG CGT CCT<br>GGG GCT AGC GTG AAG ATC ACC TGC AAA GCG TCC GGC TAT TCA<br>TTC AGC            |
| CDR1               | TYGIQ                            | ACC TAT GGG ATT CAG                                                                                                                      |
| Frame-2            | WMRQAPGQRPEWLG                   | TGG ATG CGC CAA GCG CCA GGC CAG CGT CCG GAA TGG CTT<br>GGG                                                                               |
| CDR2               | WIHAGTGGTKYSRKFQG                | TGG ATA CAT GCA GGC ACA GGT GGG ACT AAG TAC TCG CGC AAA<br>TTT CAG GGT                                                                   |
| Frame-3            | RITITRDTSANTVYLDLNSLTSEDVAVYYCAR | CGC ATT ACT ATC ACC CGT GAT ACC AGC GCG AAT ACC GTC TAT<br>CTG GAT CTG<br>AAC TCT CTG ACA TCG GAG GAT ACG GCC GTC TAT TAT TGC GCT<br>CGT |
| CDR3<br>(Template) | DKVTVWACQDN                      | GAC AAA GTT ACA GTC TGG GCT TGT CAG GAT AAT                                                                                              |
| Frame-4            | WGQGTTVTVSS                      | TGG GGT CAA GGT ACT ACG GTT ACG GTC AGC AGT                                                                                              |



# Supporting Information

**Table S3.** Analytic parameters of L1-switching peptide. The peptide was synthesized from Pepton Co. (Daejeon, Korea) using solid-phase Fmoc chemistry under consecutive flow conditions. The synthesized peptides were purified using reverse-phase HPLC (High-Performance Liquid Chromatography) and lyophilized.

| Switching peptide | Amino acid sequence                                                            | Molecular weight (g/mol) | Purity |
|-------------------|--------------------------------------------------------------------------------|--------------------------|--------|
| L1-peptide        | TYLEW <sup>5</sup> YPQKP <sup>10</sup> GQSPK <sup>15</sup> LLIYK <sup>20</sup> | 2,452                    | 90 %   |
